# Supplementary material for: Length-independent multifunctional device based on penta-tetra-pentagonal molecule: a first-principles study
Source: Royal Society of Chemistry journal article supplement (doi:10.1039/d0tc05488g), 2021-01-01
Supplement: d0tc05488g1.pdf [file d0tc05488g1.pdf]

# Length-independent multifunctional device based on tetra-penta-octagonal graphene nanoribbons: A first-principles study

Tong Chen, Wence Ding, Huili Li, Guanghui Zhou

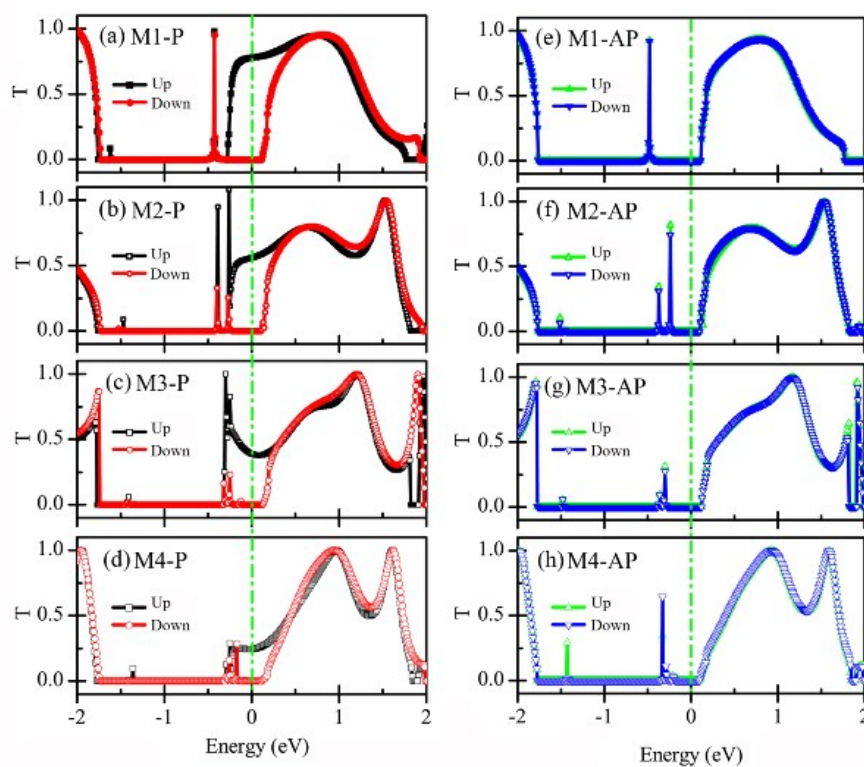

Fig. S1 The spin resolved zero bias transmission spectra of M1-M4 in P (a-d) and AP (e-h) spin configurations

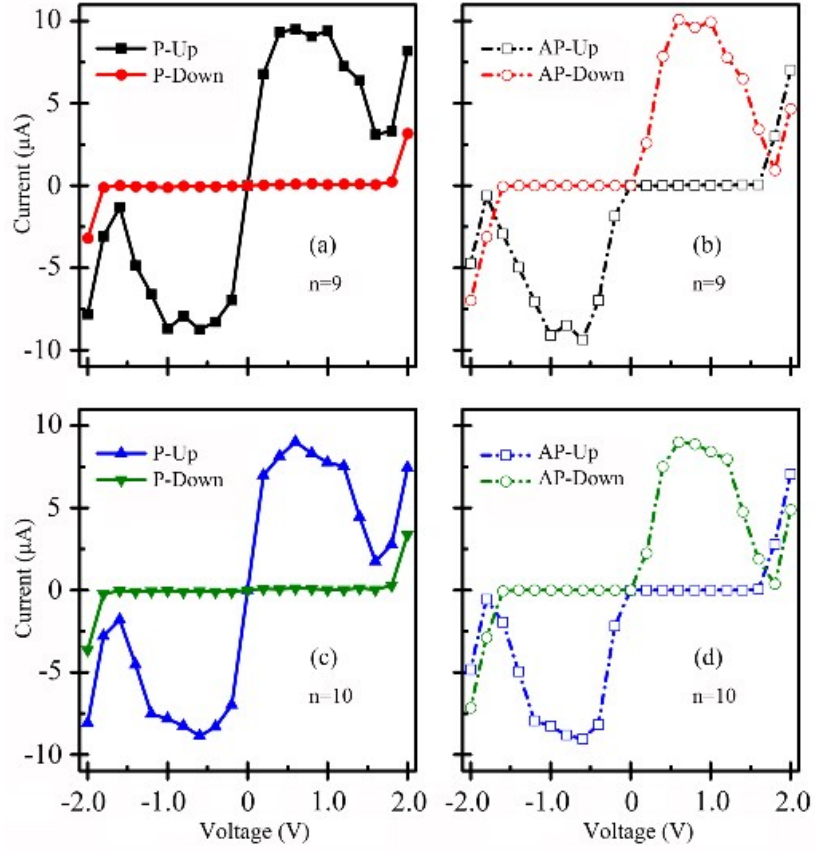

Fig. S2 The calculated spin resolved currents as a function of the applied bias for model devices with the width of TPO-graphene ribbon of  $n=9$  and  $n=10$  within the bias ranges of (-2.0, 2.0 V) in P (a,b) and AP (c,d) spin configurations.
